# Supplementary material for: Crystalline morphology formation in phase-field simulations of binary mixtures
Source: Royal Society of Chemistry journal article supplement (doi:10.1039/d3tc03047d), 2023-01-01
Supplement: d3tc03047d1.pdf [file d3tc03047d1.pdf]

# Crystalline Morphology Formation in Phase-Field Simulations of Binary Mixtures

## Supplementary Information

Maxime Siber,<sup>\*a,b</sup> Olivier J. J. Ronsin,<sup>a</sup> and Jens Harting<sup>a,b,c</sup>

<sup>a</sup> Helmholtz Institute Erlangen-Nürnberg for Renewable Energy, Forschungszentrum Jülich, Fürther Straße 248, 90429 Nürnberg, Germany, E-mail: m.siber@fz-juelich.de

<sup>b</sup> Department of Chemical and Biological Engineering, Friedrich-Alexander-Universität Erlangen-Nürnberg, Fürther Straße 248, 90429 Nürnberg, Germany

<sup>c</sup> Department of Physics, Friedrich-Alexander-Universität Erlangen-Nürnberg, Fürther Straße 248, 90429 Nürnberg, Germany

## Contents

|          |                                                                                          |          |
|----------|------------------------------------------------------------------------------------------|----------|
| <b>A</b> | <b>Composition-Dependence of Kinetic Coefficients</b>                                    | <b>1</b> |
| <b>B</b> | <b>Sensitivity of the Liquidus and the Solidus to Thermodynamic Parameter Variations</b> | <b>2</b> |
| <b>C</b> | <b>Formulae for Free Energy Landscape Analysis</b>                                       | <b>3</b> |
| <b>D</b> | <b>Sensitivity Study: Additional Parameter Variations</b>                                | <b>4</b> |
| <b>E</b> | <b>Diffusion-Limited Crystallization: Transformation Kinetics</b>                        | <b>4</b> |
| <b>F</b> | <b>Demixing-Assisted Crystallization: Transformation Kinetics</b>                        | <b>5</b> |
| <b>G</b> | <b>Demixing-Assisted Crystallization: Additional Morphology Formation Pathways</b>       | <b>6</b> |
| <b>H</b> | <b>Dilution-Enhanced Crystallization: Morphology Formation Pathways</b>                  | <b>7</b> |
|          | <b>References</b>                                                                        | <b>8</b> |

## A Composition-Dependence of Kinetic Coefficients

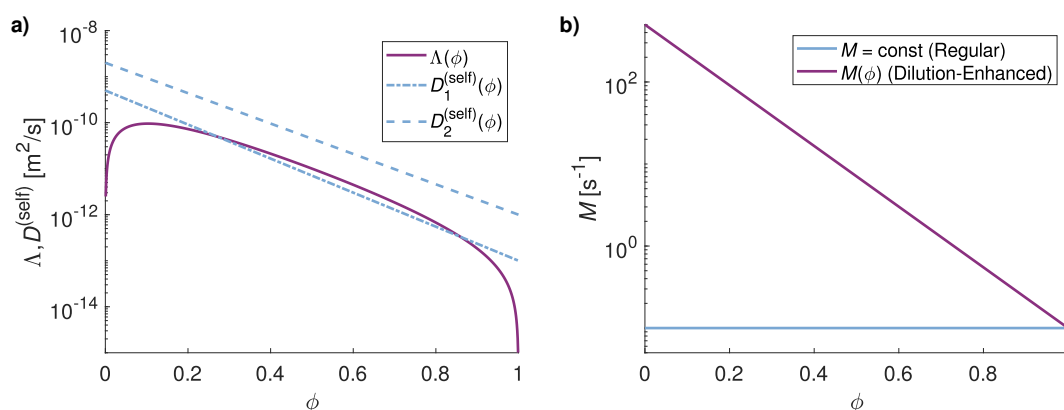

Figure 1: **a**) Composition-dependence of the self-diffusion ( $D_1^{(\text{self})}$ ,  $D_2^{(\text{self})}$ ) and Onsager ( $\Lambda$ ) coefficients, as respectively calculated from a logarithmic mean interpolation and the fast mode theory. **b**) Comparison of the evolution of the Allen-Cahn mobility coefficient  $M$  with  $\phi$  in the regular and dilution-enhanced crystallization scenarios. In both cases,  $M_0 = 0.1 \text{ s}^{-1}$  was employed.

## B Sensitivity of the Liquidus and the Solidus to Thermodynamic Parameter Variations

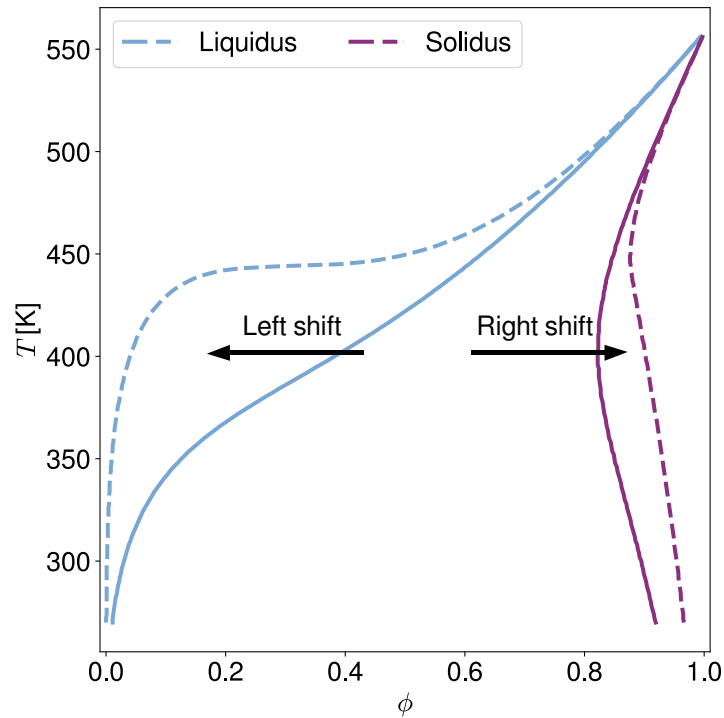

Figure 2: Phase diagram illustrating the shift of the liquidus and solidus curves produced by thermodynamic parameter variations as listed in Tab.1 of the SI. In this particular example, the interaction parameter  $\chi_{aa}$  is increased from 0.7248 (solid lines) to 1.2648 (dashed lines). All other thermodynamic parameters are identical to those reproduced in Tab.1 of the main article.

| Increased Parameter                                                               | Effect on liquidus | Effect on solidus  |
|-----------------------------------------------------------------------------------|--------------------|--------------------|
| $v_0$ (with $N_1 = \text{const}$ , $N_2 = \text{const}$ , $\rho = \text{const}$ ) | Left shift         | Slight left shift  |
| $N_1$ (when $N_2 = 1$ )                                                           | Slight left shift  | Slight right shift |
| $N_2$ (when $N_1 = 1$ )                                                           | Right shift        | Right shift        |
| $\rho$ (with $N_1 = \text{const}$ )                                               | Left shift         | Left shift         |
| $\rho$ (with constant molar mass, i.e $N_1$ decreasing and $N_2 = 1$ )            | Left shift         | Left shift         |
| $\rho$ (with constant molar mass, i.e $N_2$ increasing and $N_1 = 1$ )            | Slight left shift  | Slight right shift |
| $T_m$                                                                             | Left shift         | Left shift         |
| $L$ (with $\chi_{ca} = \text{const}$ )                                            | Left shift         | Left shift         |
| $L$ (with $\chi_{ca} \propto L/RT$ )                                              | Left shift         | Right shift        |
| $W$                                                                               | Negligible         | Negligible         |
| $\chi_{aa}$                                                                       | Left shift         | Right shift        |
| $\chi_{ca}$                                                                       | Right shift        | Right shift        |

Table 1: List of thermodynamic model parameter relevant for the phase diagram computation. Qualitative effects on liquidus and solidus equilibrium curves are specified with respect to an amorphous-crystalline  $\phi - T$  phase diagram (see Fig.2) which  $\phi$ -axis represents the volume fraction of the crystalline component ( $\phi = 0$  being at the left and  $\phi = 1$  at the right limit).

## C Formulae for Free Energy Landscape Analysis

This section reports the derivation of the analytical relationships used to locate the energy barrier, the energy minimum, and the pseudo-spinodal in the contour plot of the free energy landscape. For a given composition  $\phi$ , a minimum or maximum for the total bulk free energy density, defined by

$$G_V^{(bulk)} = \phi\rho \left[ q(\psi)W + p(\psi)L \left( \frac{T}{T_m} - 1 \right) \right] + \frac{RT}{v_0} \left[ \frac{\phi \ln(\phi)}{N_1} + \frac{(1-\phi) \ln(1-\phi)}{N_2} + \phi(1-\phi)(\chi_{aa} + \chi_{ca}\psi^2) \right], \quad (1)$$

is reached when its gradient with respect to the order parameter  $\psi$  vanishes, i.e:

$$\frac{\partial G_V^{(bulk)}}{\partial \psi} = \phi\rho \left[ q'(\psi)W + p'(\psi)L \left( \frac{T}{T_m} - 1 \right) \right] + \frac{2RT}{v_0} \phi(1-\phi)\chi_{ca}\psi = 0. \quad (2)$$

Recalling that  $q(\psi)$  and  $p(\psi)$  are polynomials in  $\psi$ , their derivatives are straightforwardly obtained as  $q'(\psi) = 2\psi - 6\psi^2 + 4\psi^3$  and  $p'(\psi) = 6\psi - 6\psi^2$ . Substituting these into Eq.2 and factorizing with  $\psi$  reveals a trivial solution:  $\psi_1^* = 0$ . In order to find the remaining two, Eq.2 can be simplified to a second order equation in  $\psi$ ,

$$\left[ \rho W + 3\rho L \left( \frac{T}{T_m} - 1 \right) + \frac{RT}{v_0} (1-\phi)\chi_{ca} \right] - 3\rho \left[ W + L \left( \frac{T}{T_m} - 1 \right) \right] \psi + 2\rho W \psi^2 = 0, \quad (3)$$

which, once solved, yields

$$\psi_{2,3}^* = \frac{3}{4} \left[ 1 + \left( \frac{L \left( \frac{T}{T_m} - 1 \right)}{W} \right) \right] \pm \frac{1}{4} \sqrt{\left( 1 - \frac{3L \left( \frac{T}{T_m} - 1 \right)}{W} \right)^2 - \frac{8RT\chi_{ca}(1-\phi)}{v_0\rho W}}. \quad (4)$$

Respectively,  $\psi_2^*$  represents the position of the energy barrier and  $\psi_3^*$  the corresponding minimum as a function of  $\phi$ . Considering that  $\psi_2^* > 0$  so that the energy barrier is located at positive order parameter values, this formula also provides a lower boundary for the barrier parameter  $W$  depending on the heat of fusion  $L$  and the crystalline-amorphous interaction parameter  $\chi_{ca}$  (which is actually dependent on  $L$  as well, i.e  $\chi_{ca} = C \frac{v_0 N_1 \rho L}{RT}$ , with  $C$  a proportionality constant):

$$W > 3L \left( 1 - \frac{T}{T_m} \right) - \frac{RT}{v_0} (1-\phi) \frac{\chi_{ca}}{\rho} \iff W > L \left[ 3 \left( 1 - \frac{T}{T_m} \right) - N_1 C (1-\phi) \right]. \quad (5)$$

In a similar manner, the spinodal-like points are attained for a certain  $\psi$  when the second derivative of  $G_V^{(bulk)}$  (Eq.1) in  $\phi$  equals 0:

$$\frac{\partial^2 G_V^{(bulk)}}{\partial \phi^2} = \frac{RT}{v_0} \left[ \frac{1}{N_1 \phi} + \frac{1}{N_2 (1-\phi)} - 2(\chi_{aa} + \chi_{ca}\psi^2) \right] = 0. \quad (6)$$

Again, this equation can be expressed as a quadratic form,

$$-2N_1 N_2 (\chi_{aa} + \chi_{ca}\psi^2) \phi^2 + [2N_1 N_2 (\chi_{aa} + \chi_{ca}\psi^2) - N_1 + N_2] \phi - N_2 = 0, \quad (7)$$

which, upon resolution, gives

$$\phi_{1,2}^* = \frac{1}{2} \left[ 1 + \frac{1}{2N_1(\chi_{aa} + \chi_{ca}\psi^2)} - \frac{1}{2N_2(\chi_{aa} + \chi_{ca}\psi^2)} \pm \sqrt{\left( 1 + \frac{N_2 - N_1}{2N_1 N_2 (\chi_{aa} + \chi_{ca}\psi^2)} \right)^2 - \frac{2}{N_1(\chi_{aa} + \chi_{ca}\psi^2)}} \right]. \quad (8)$$

In addition, the pseudo-binodal points can then be obtained for each  $\psi$  with a numeric routine, as for instance the one described by Horst [1][2].

## D Sensitivity Study: Additional Parameter Variations

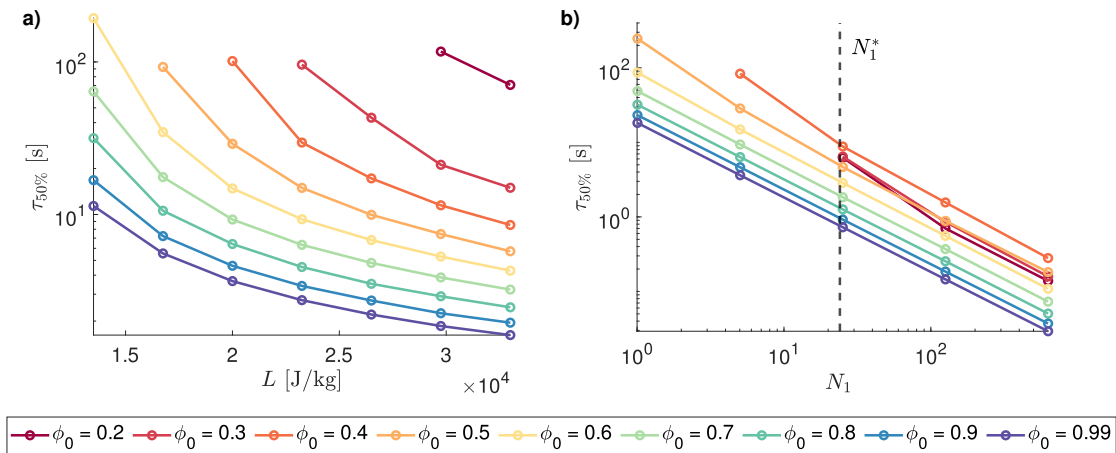

Figure 3: **a)** Sensitivity of the crystallization kinetics to variations of  $L$  (with  $\chi_{ca} = 0.1648 \frac{v_0 N_1 \rho L}{RT}$ ). **b)** Sensitivity of the crystallization kinetics to variations of  $N_1$ . The critical value  $N_1^* \approx 24.031$ , beyond which an initial amorphous-amorphous demixing accelerates crystallization for the lowest blend ratios, is calculated by solving the equation describing the threshold criterion for AAPS (Eq.17 in the main article) for  $N_1$  with  $\chi_{aa} = 0.7248$ . All other simulation parameters are identical to those reproduced in Tab.1 of the main article.

## E Diffusion-Limited Crystallization: Transformation Kinetics

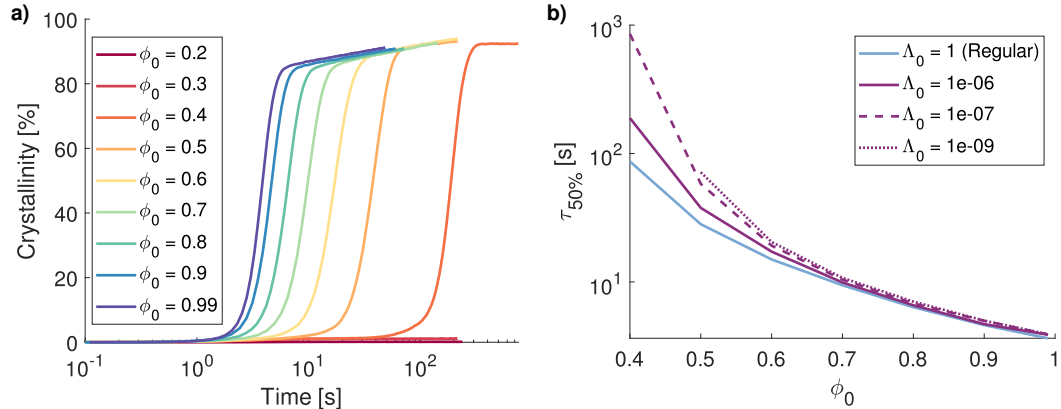

Figure 4: **a)** Transformation kinetics at different blend ratios for a diffusion-limited system. Except for  $\Lambda_0 = 10^{-6}$ , all simulation parameters are identical to those reproduced in Tab.1 of the main article. **b)** Comparison of the crystallization half-time as a function of blend composition in the diffusion-limited and regular crystallization regimes.

## F Demixing-Assisted Crystallization: Transformation Kinetics

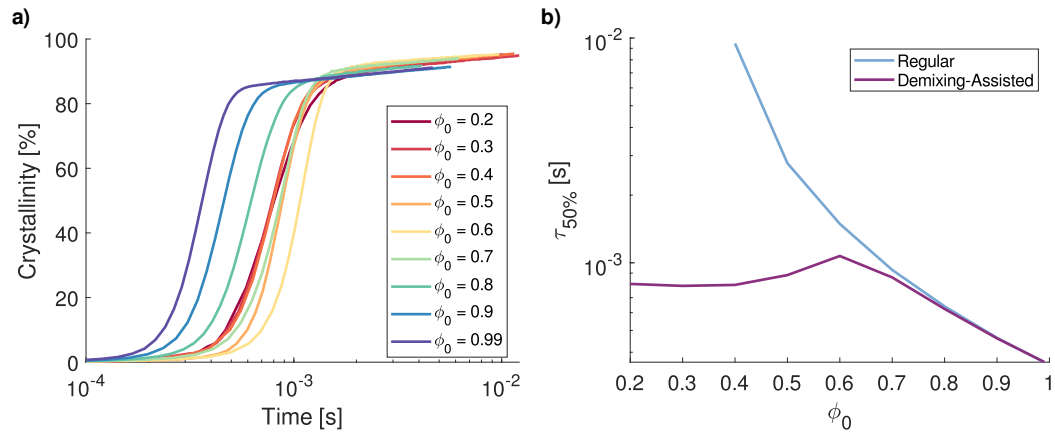

Figure 5: **a)** Transformation kinetics at different blend ratios for an immiscible binary mixture. Except for  $\chi_{aa} = 1.2648$  and  $M_0 = 1000 \text{ s}^{-1}$ , all simulation parameters are identical to those reproduced in Tab.1 of the main article. **b)** Comparison of the crystallization half-time as a function of blend composition in the demixing-assisted and regular crystallization regimes (with  $M_0 = 1000 \text{ s}^{-1}$ ).

## G Demixing-Assisted Crystallization: Additional Morphology Formation Pathways

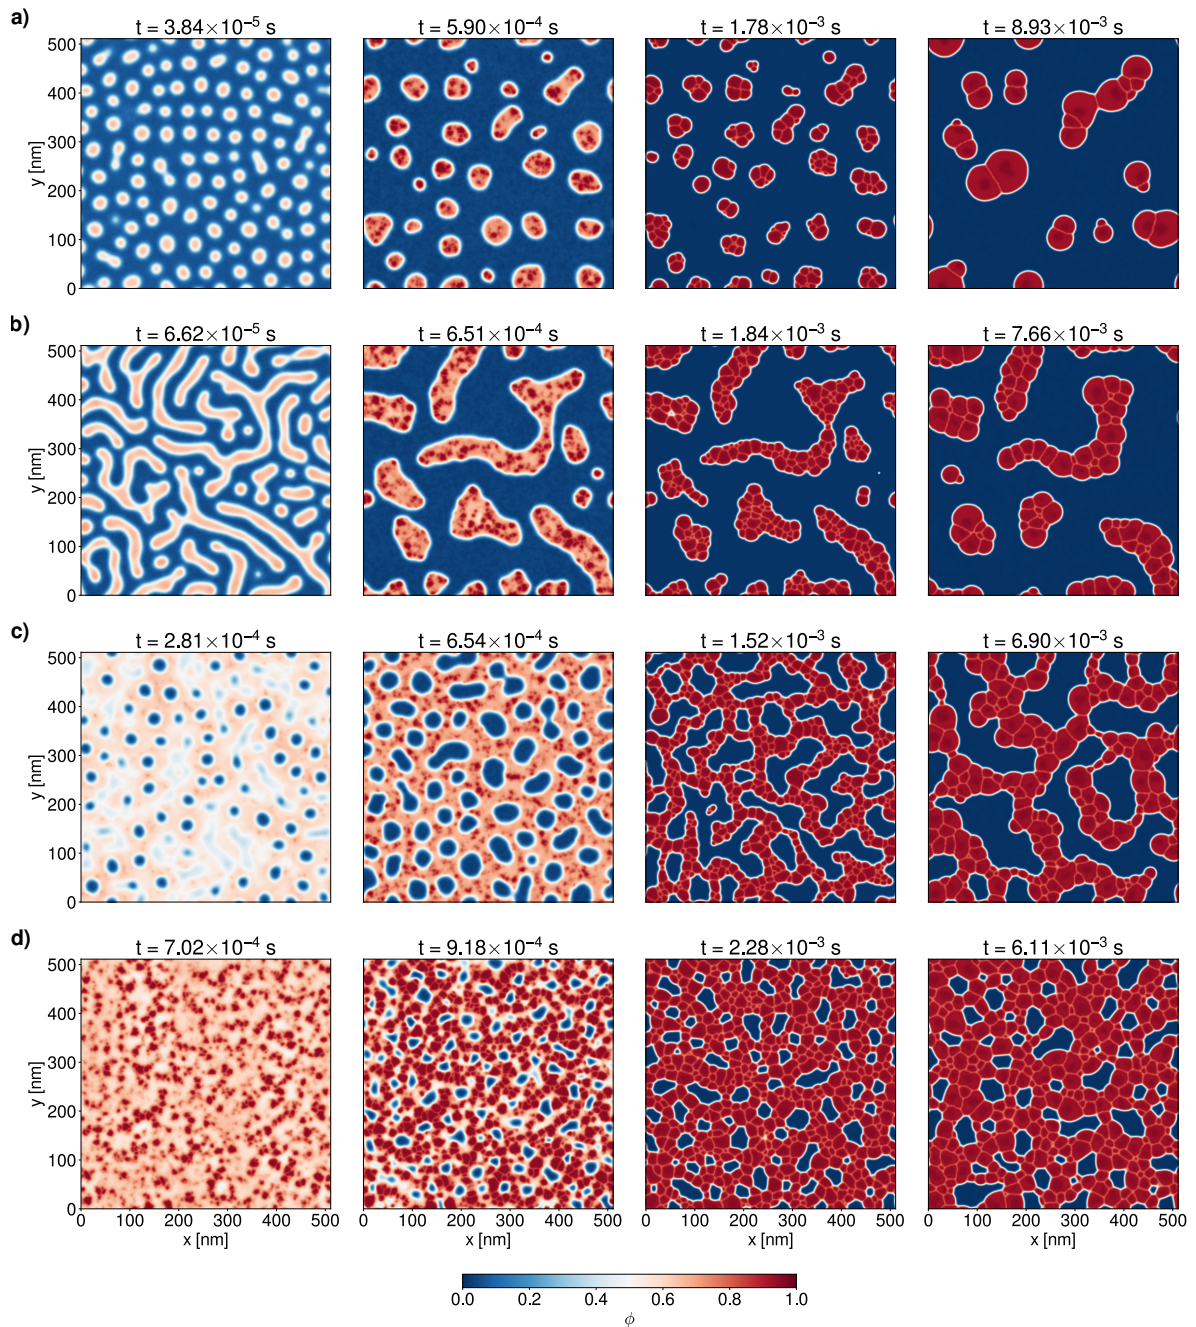

Figure 6: Progress of crystallization simulated for the immiscible system (represented by the phase diagram Fig.8-a in the main article) at  $T = 333$  K and blend ratios **a)**  $\phi_0 = 0.2$ , **b)**  $\phi_0 = 0.3$ , **c)**  $\phi_0 = 0.5$ , and **d)**  $\phi_0 = 0.7$ . For all simulations, the parameters are identical to Tab.1 of the main article, except  $M_0 = 1000$  s $^{-1}$  and  $\chi_{aa} = 1.2648$ . In the cases **a)**, **b)** and **c)**, crystals start to nucleate and grow during the coarsening stage of the initial spinodal decomposition. The crystallization is triggered in the domains where the solute is in majority and grain boundary coarsening also takes place once crystals impinge. For comparison, configuration **d)** presents the crystallization process for a blend ratio outside of the binodal interval. Here, crystal nucleation and growth occurs directly and solute in the initially mixed amorphous phase is homogeneously consumed without spinodal decomposition or local formation of solvent-rich droplets by NG.



## H Dilution-Enhanced Crystallization: Morphology Formation Pathways

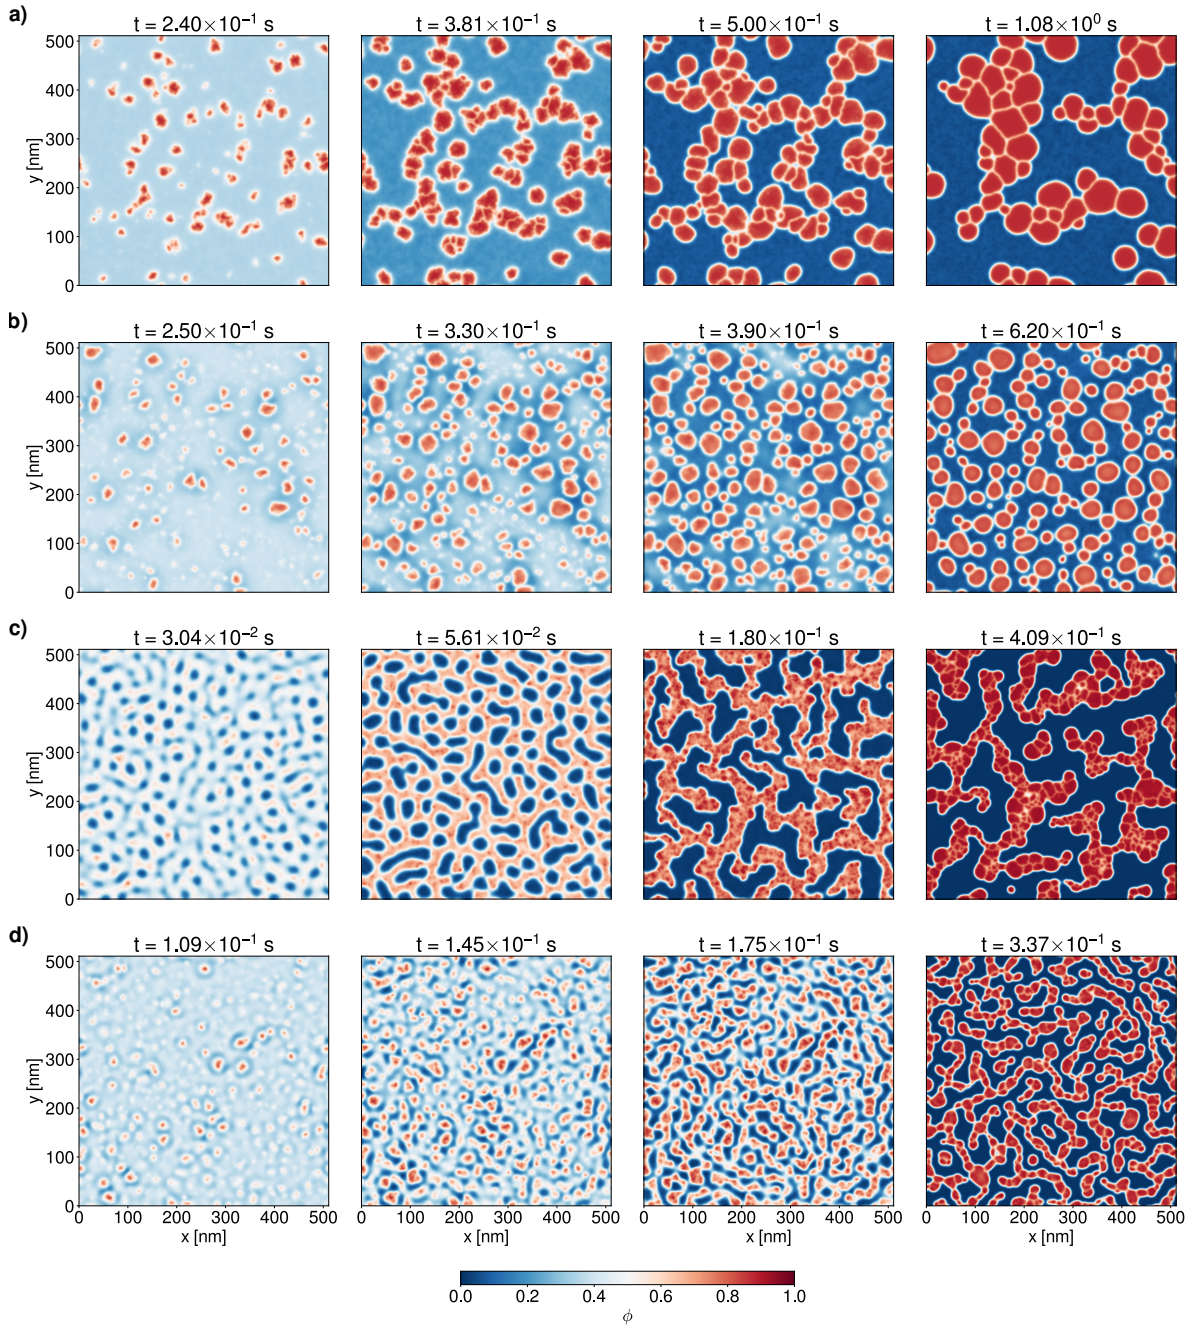

Figure 7: Progress of crystallization for a binary blend in the dilution-enhanced regime (i.e.  $M(\phi)$ ) at  $T = 333$  K and blend ratio  $\phi_0 = 0.4$  with **a)** regular, **b)** diffusion-limited ( $\Lambda_0 = 10^{-4}$ ), **c)** demixing-assisted ( $\chi_{aa} = 1.2648$ ,  $\Lambda_0 = 10^{-3}$ ), and **d)** combined immiscible and diffusion-limited behavior ( $\chi_{aa} = 1.2648$ ,  $\Lambda_0 = 10^{-4}$ ). Besides the specified modifications, all simulation parameters are identical to those reproduced in Tab.1 of the main article.

---

## References

1. Horst, R. Calculation of Phase Diagrams Not Requiring the Derivatives of the Gibbs Energy Demonstrated for a Mixture of Two Homopolymers with the Corresponding Copolymer. *Macromolecular Theory and Simulations* **4**, 449–458 (1995).
2. Horst, R. Calculation of Phase Diagrams Not Requiring the Derivatives of the Gibbs Energy for Multinary Mixtures. *Macromolecular Theory and Simulations* **5**, 789–800 (1996).
